# Supplementary material
Source: PubMed Central journal article supplement (PMC6287936)
Supplement: NIHMS1503988-supplement-Supplemental_Data.pdf [file NIHMS1503988-supplement-Supplemental_Data.pdf]

$\alpha$ SMA/SM22 $\alpha$ /DAPI

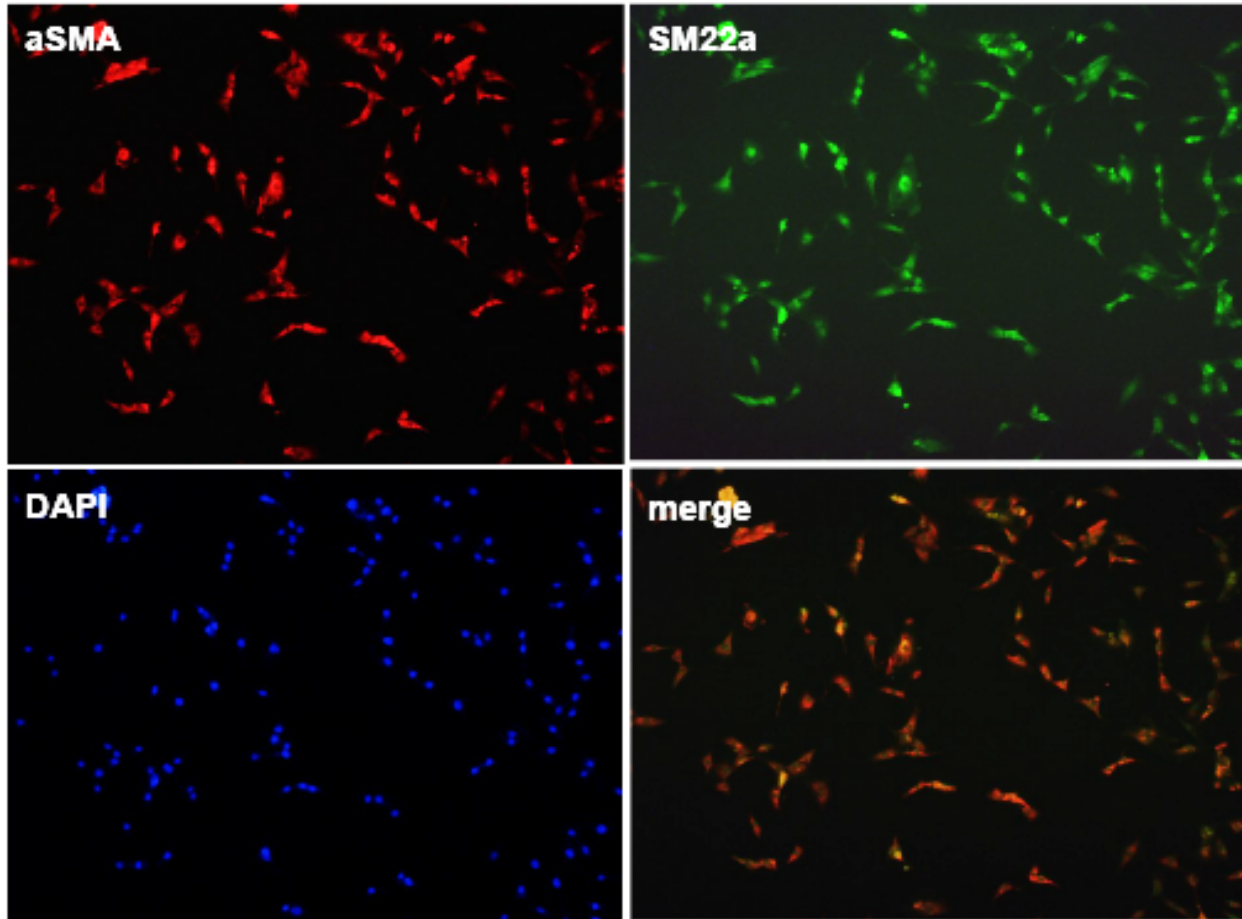

**Supplemental Figure I. Cells isolated from mouse aortas are SMC.** Aortic SMC were isolated from SM22 $\alpha$ -CreKI/IGF1R-flox (IGF1R/FIR) and FIR mice as described in Materials and Methods. To confirm cell identity, cells were plated on chamber slide and co-stained with SMC markers:  $\alpha$ -SMA/AlexaFluor594 and SM22 $\alpha$ /AlexaFluor488 and with DAPI. Red and green signals were co-localized on merged images showing that these cells are SMC.

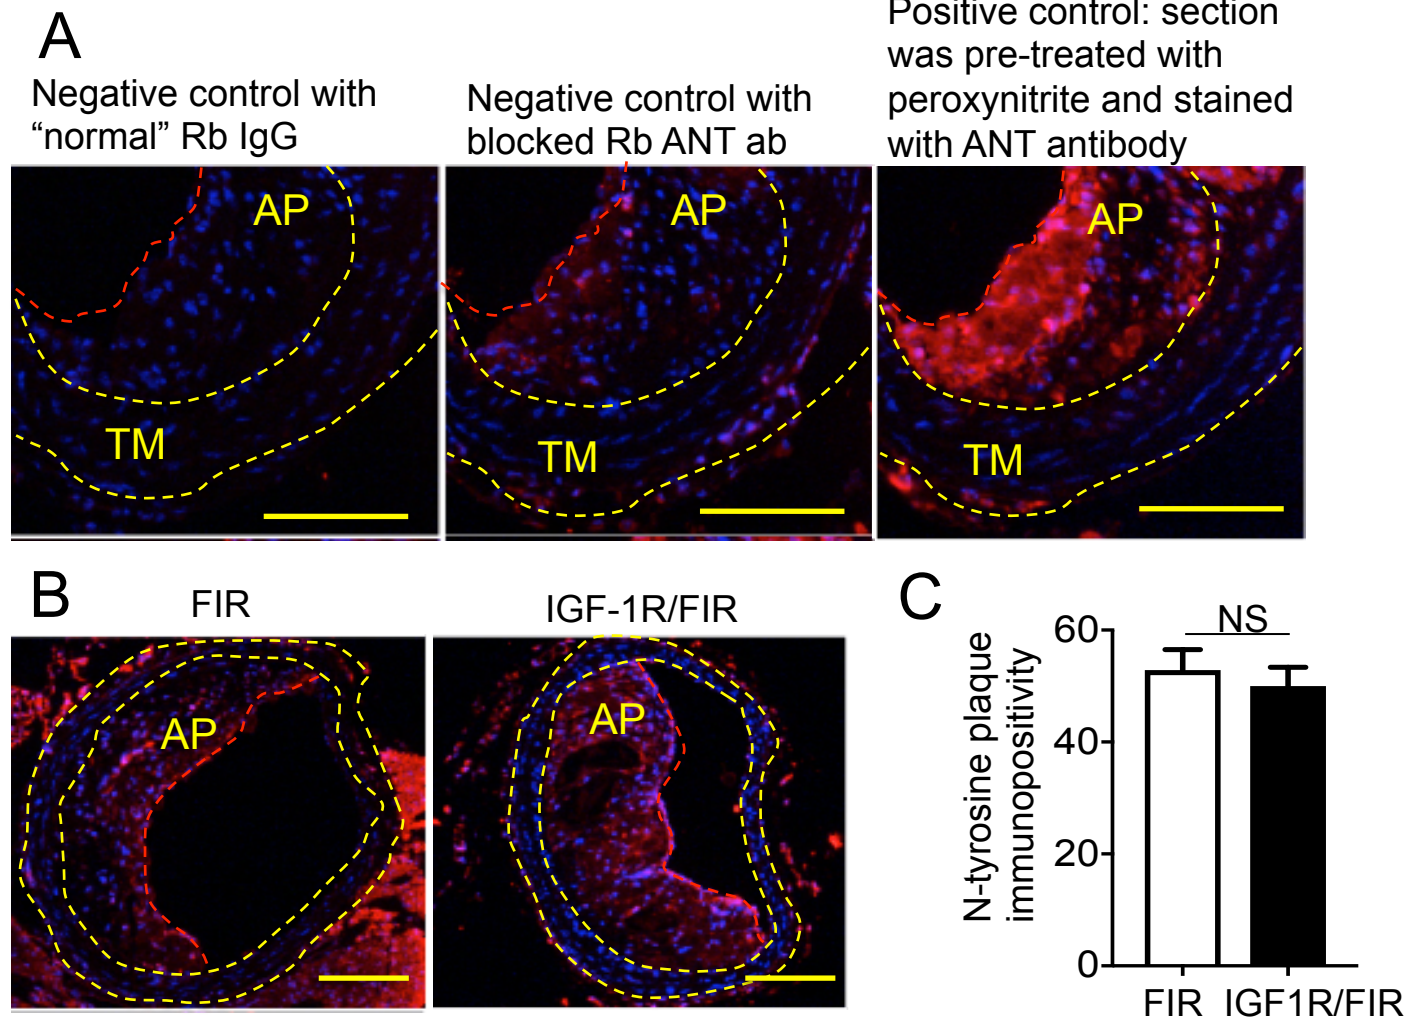

**Supplemental Figure II. Atherosclerotic plaque oxidative stress.** A. Controls for IHC with anti-N-tyrosine antibody (ANT). Negative controls: serial BCA cross-sections were stained with “normal” rabbit IgG or with ANT blocked by incubation with 3-Nitro-L-tyrosine. Positive control: section was pre-treated with peroxynitrite and stained with ANT. B. Representative images of BCA sections obtained from IGF-1R/FIR mice (n=7) and FIR mice (n=6) and stained with ANT. The mean “red” pixels number was normalized per plaque area and these data are shown on the graph (C). AP, atherosclerotic plaque, yellow dashed line, tunica media (TM). Scale bar, 50μm.

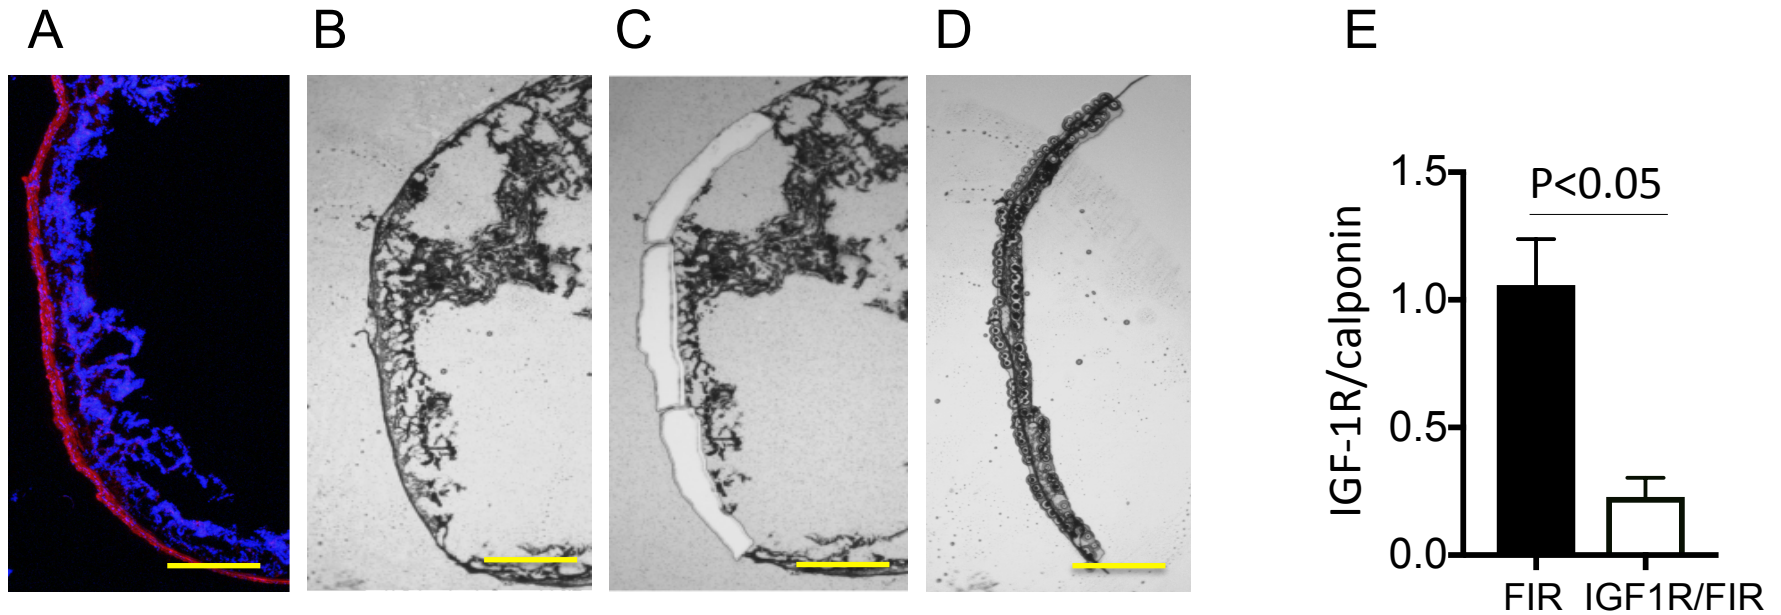

**Supplemental Figure III. IGF-1R expression in non-vascular (intestinal) SMC.** A-D. Laser capture microdissection (LCM) method. Terminal ileum was dissected from SM22 $\alpha$ -CreKI/IGF1R-flox mice (IGF1R/FIR, n=4) and control mice (FIR, n=7), tissue was embedded in OCT and single cryosection was immunostained for calponin to identify SMC and serve as a reference for LCM (A). Serial sections were utilized for LCM-assisted isolation of the intestinal layer guided by reference section (B-C). Isolated tissue was transferred into LCM cap (D) and used for RNA isolation. E, RT-PCR quantitative data. Scale bar, 200  $\mu$ m.

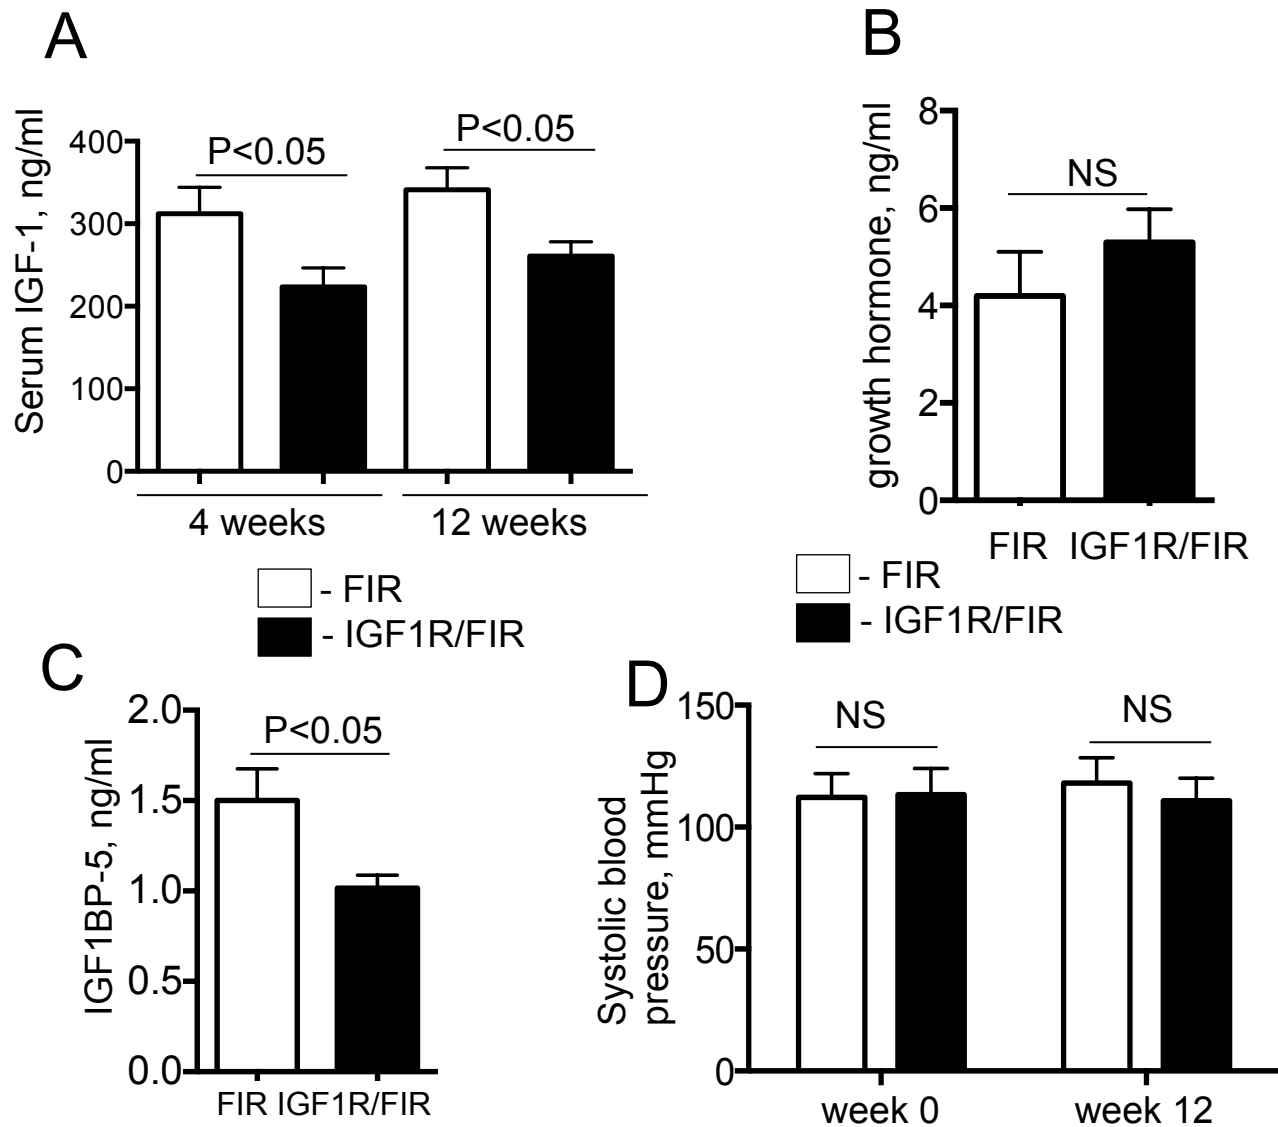

**Supplemental Figure IV. IGF-1R deficiency reduced circulating IGF-1.** Serum IGF-1 levels were quantified in SM22 $\alpha$ -CreKI/IGF1R-flox (IGF1R/FIR) mice and FIR mice (n=6/group) after 4 and 12 weeks of mice feeding with a high-fat Western-type diet (WD) (A). Growth hormone level was quantified by ELISA after 12 weeks of feeding with WD (n=6/group) (B). IGF1BP5 level was quantified by ELISA (C). Blood pressure was measured by tail cuff method (D).

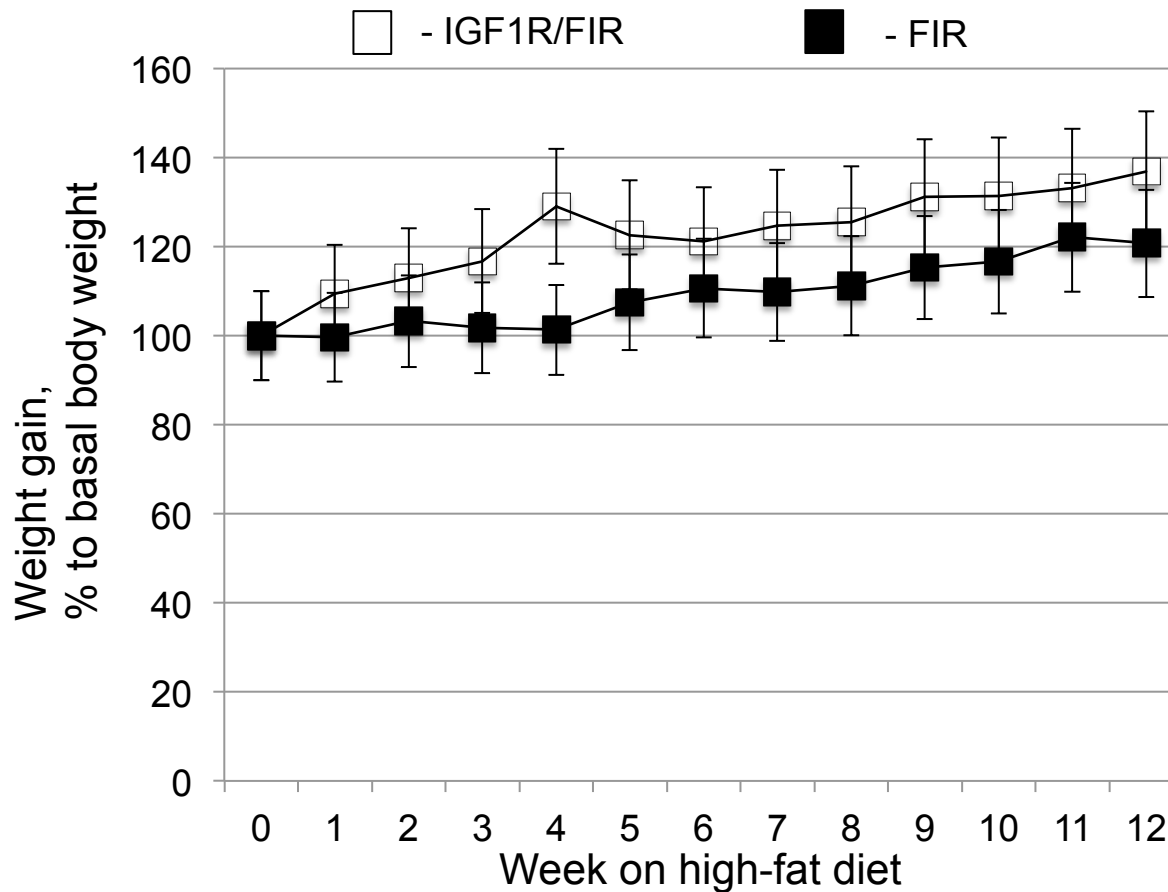

**Supplemental Figure V. Weight gain of IGF-1R-deficient and control mice.** SM22 $\alpha$ -CreKI/IGF1R-flox mice (IGF1R/FIR, n=28) and control mice (FIR, n=55) were fed with Western type diet for 12 weeks and body weight (BW) was measured every week. Weight gain is shown as a BW percentage per time zero.

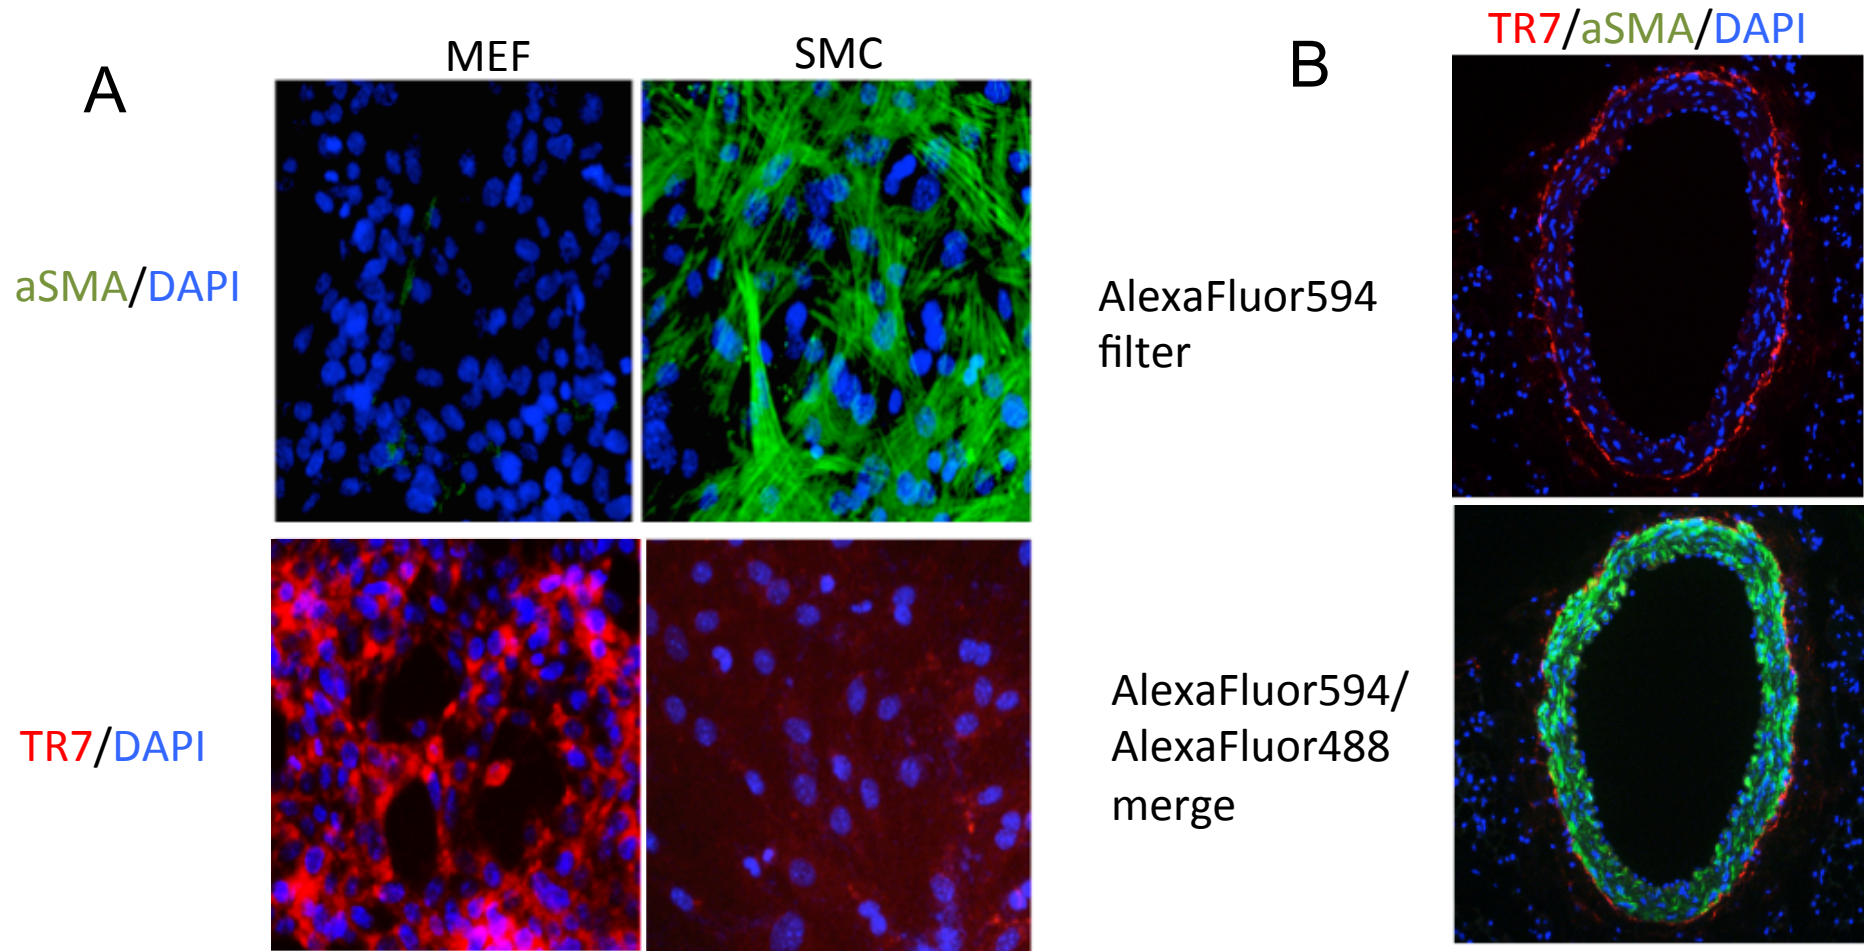

**Supplemental Figure VI. Validation of SMC and fibroblast marker antibodies.** Mouse embryonic fibroblasts (MEF) and SMC were stained with a mix of mouse  $\alpha$ -SMA antibody (a SMC marker) and rat TR7 antibody (a fibroblast marker) followed by secondary antibody (a mix of anti-mouse AlexaFluor488 and anti-rat AlexaFluor594) (A). SMC marker signal was detected in SMC and no signal was found in MEF. TR7 antibody stained MEF and did not stain SMC. Sections of ascending aorta were co-stained with TR7/AlexaFluor594 and  $\alpha$ -SMA/AlexaFluor488 (B). TR7 signal was located exclusively in the adventitial layer and the  $\alpha$ -SMA signal was localized only in the vascular media.

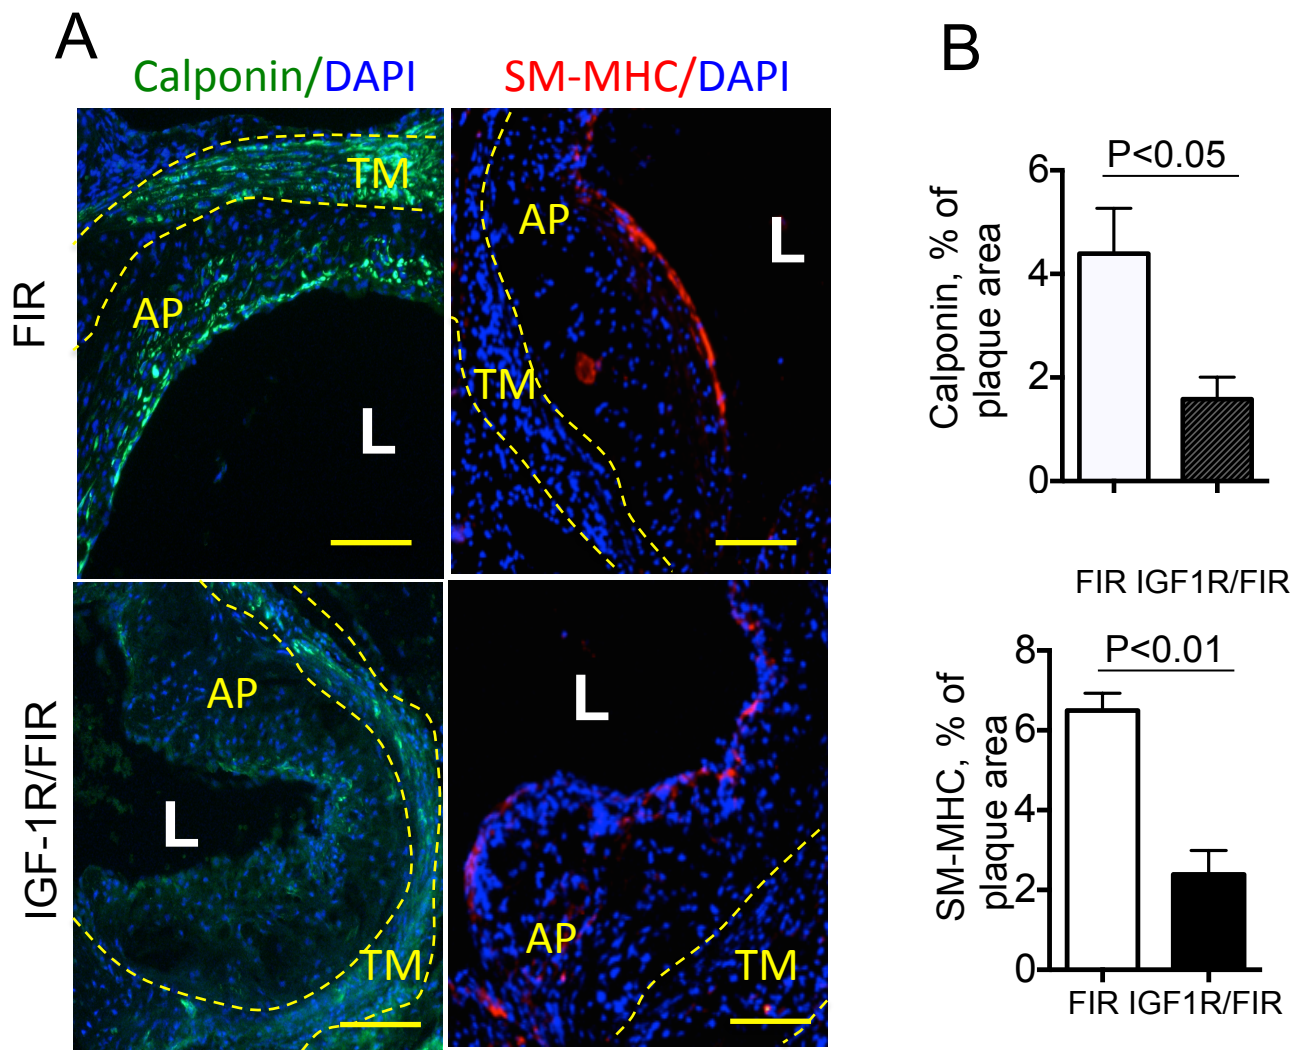

**Supplemental Figure VII. IGF-1R deficiency decreased plaque SMC levels.** Aortic valve cross-sections were obtained from IGF-1R-deficient (SM22 $\alpha$ -CreKI/IGF1R-flox mice, n=14) and control mice (FIR mice, n=14/group) fed with WD for 12 weeks. SMC were identified by IHC for calponin and for smooth muscle myosin heavy chain (SM-MHC) (both are SMC makers). B, Quantitative data. Yellow dashed line, tunica media (TM), AP, atherosclerotic plaque, L, lumen. Scale bar, 50 $\mu$ m.

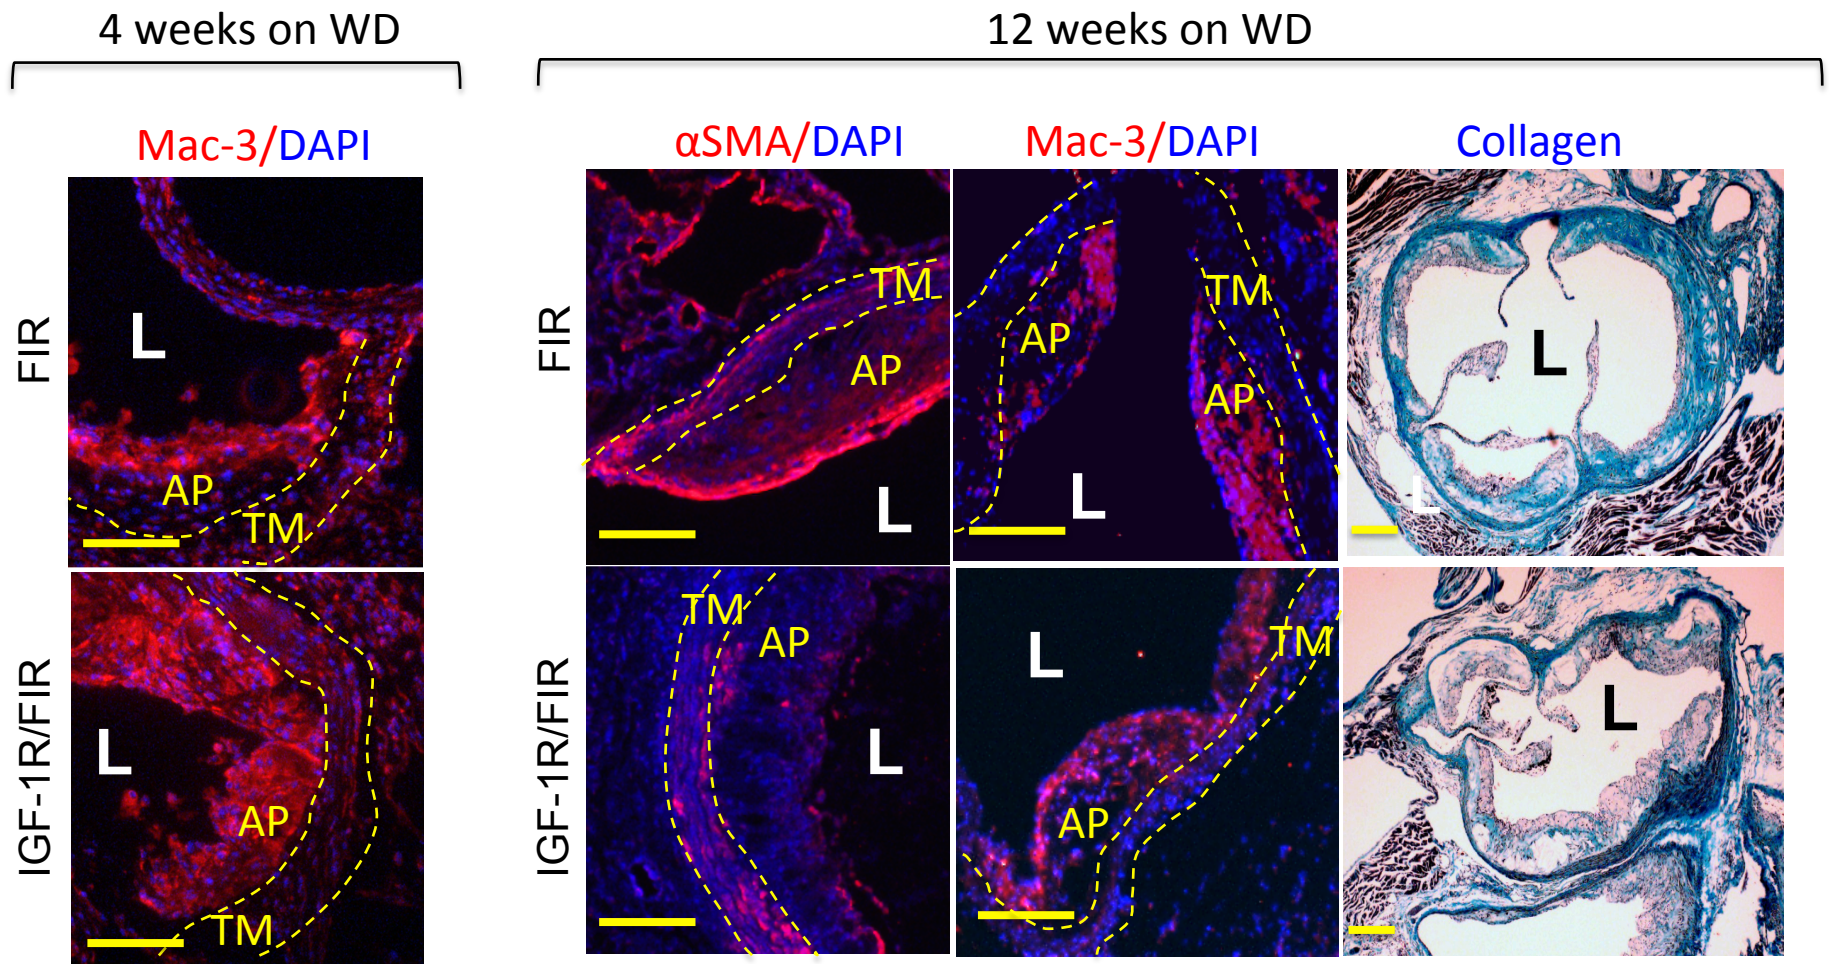

**Supplemental Figure VIII. SMC, macrophages and collagen in the atherosclerotic plaque.** SM22 $\alpha$ -CreKI/IGF1R-flox mice (IGF-1R/FIR) and control mice (FIR mice) were fed with WD for 4 and for 12 weeks. Serial sections (6  $\mu$ m) were taken throughout the entire aortic valve area and used for IHC for  $\alpha$ -SMA (SMC marker), Mac-3 (macrophage marker) and for Trichrome staining (collagen). Representative images are shown. Yellow dashed line, tunica media (TM), AP, atherosclerotic plaque, L, lumen. Scale bar, 100  $\mu$ m.



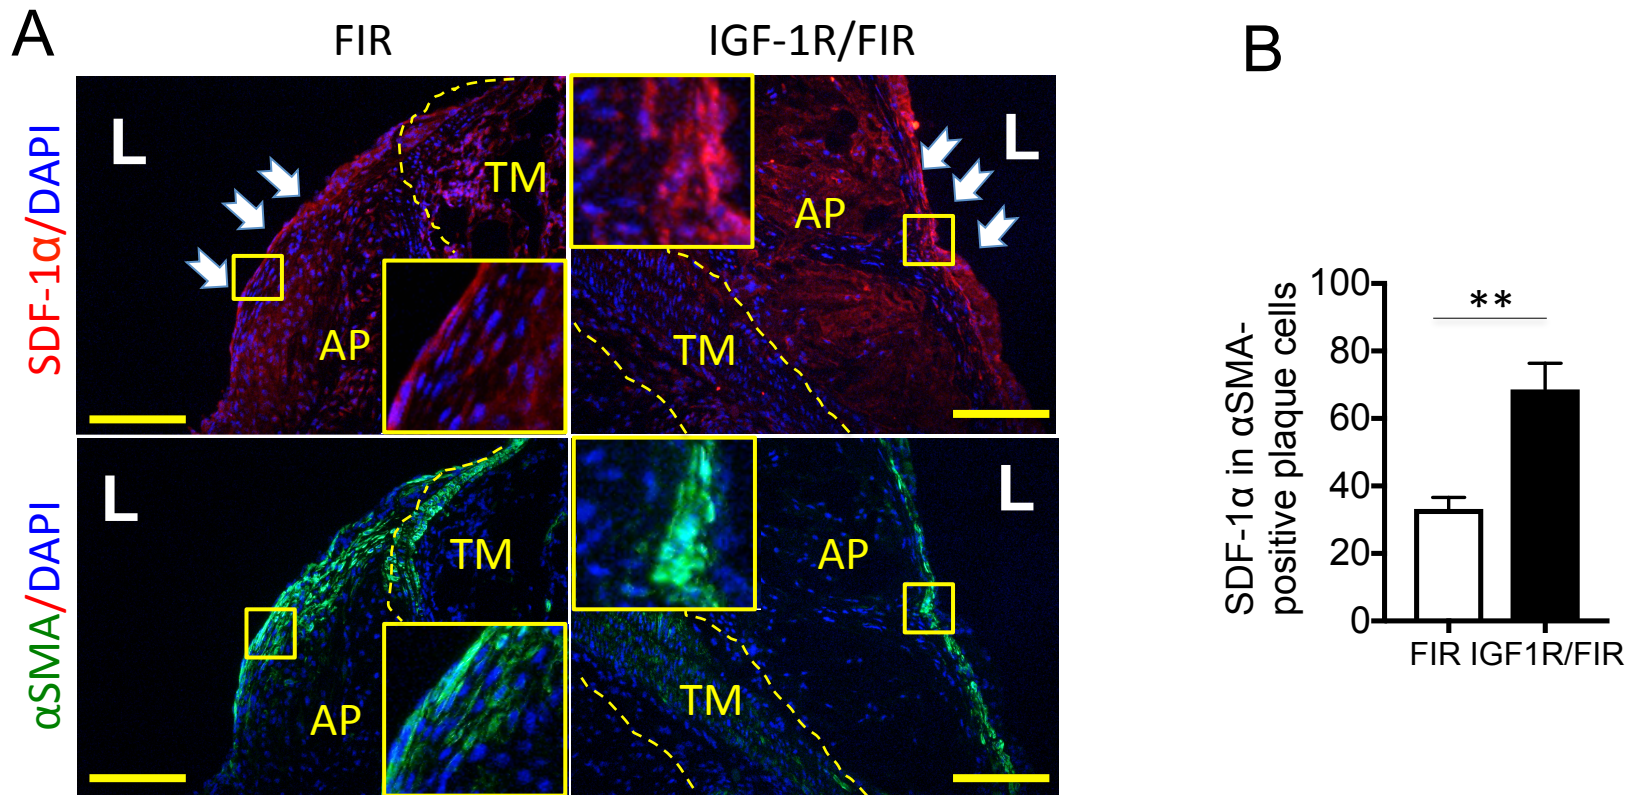

**Supplemental Figure IX. IGF-1R deficiency upregulates chemokine SDF-1 $\alpha$  (Cxcl12) in  $\alpha$ SMA-positive plaque cells.** A, SM22 $\alpha$ -CreKI/IGF1R-flox mice (IGF-1R/FIR) and control mice (FIR mice) were fed with WD for 4 weeks and aortic valve cross-sections (n=6, IGF-1R/FIR; n=5, FIR) were co-stained with  $\alpha$ SMA-AlexaFluor488 and with rabbit SDF-1 $\alpha$  antibody followed by staining with DAPI and anti-rabbit-AlexaFluor594 conjugate. Representative images are shown. Square insert/white arrows,  $\alpha$ SMA/SDF-1 $\alpha$ -double positive plaque cells. Yellow dashed line, tunica media (TM), AP, atherosclerotic plaque, L, lumen. \*\*P<0.01. Scale bar, 100  $\mu$ m. B, Quantitative data

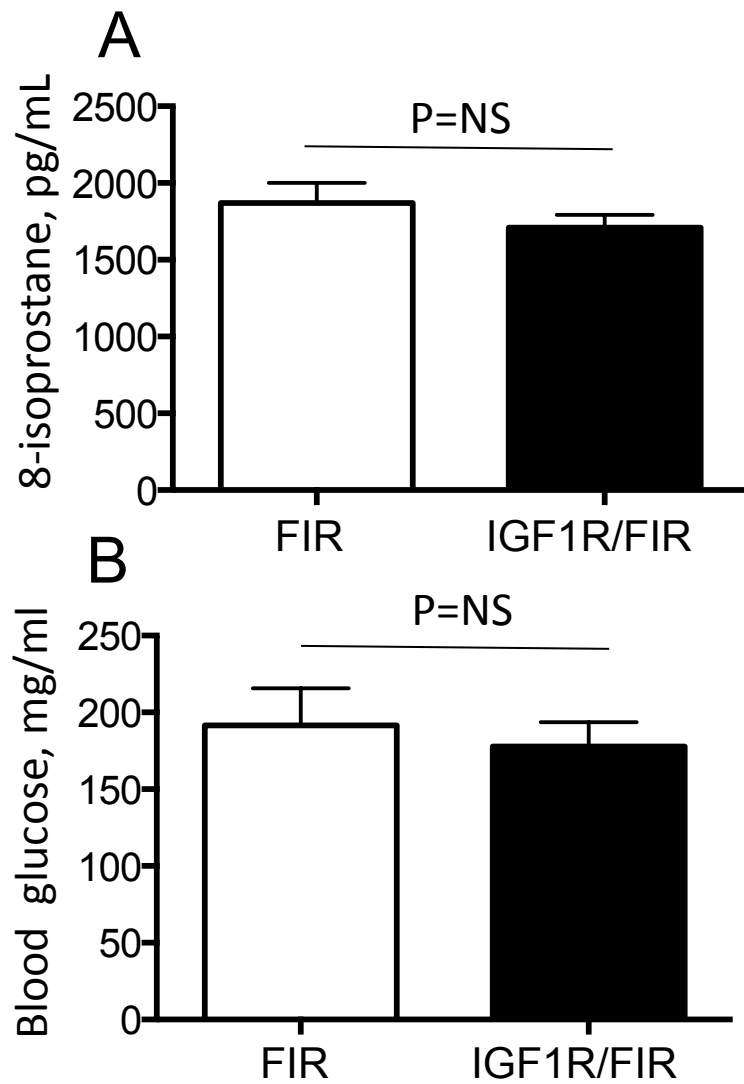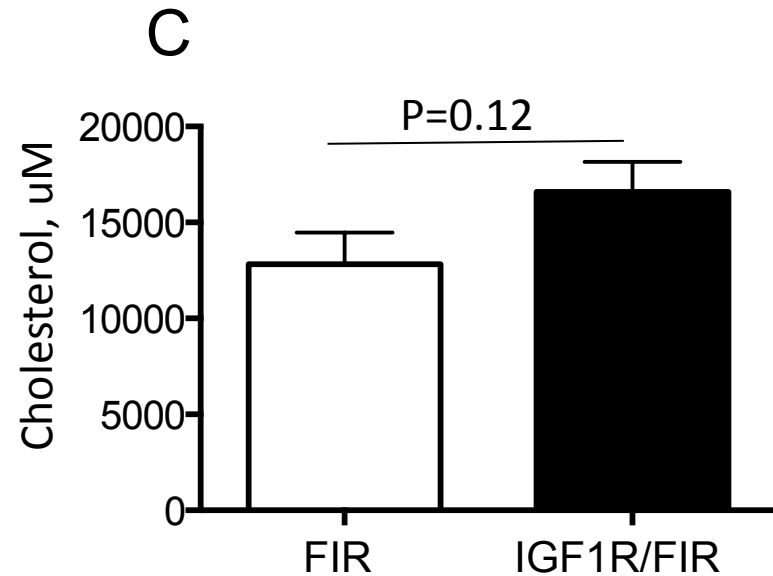

**Supplemental Figure X. Eight-isoprostane (A), blood glucose (B) and cholesterol levels (C).** Eight-isoprostane (a marker of systemic oxidative stress) and cholesterol levels were quantified using commercially available kits and blood glucose was measured with a glucometer (n=6/group).

**A**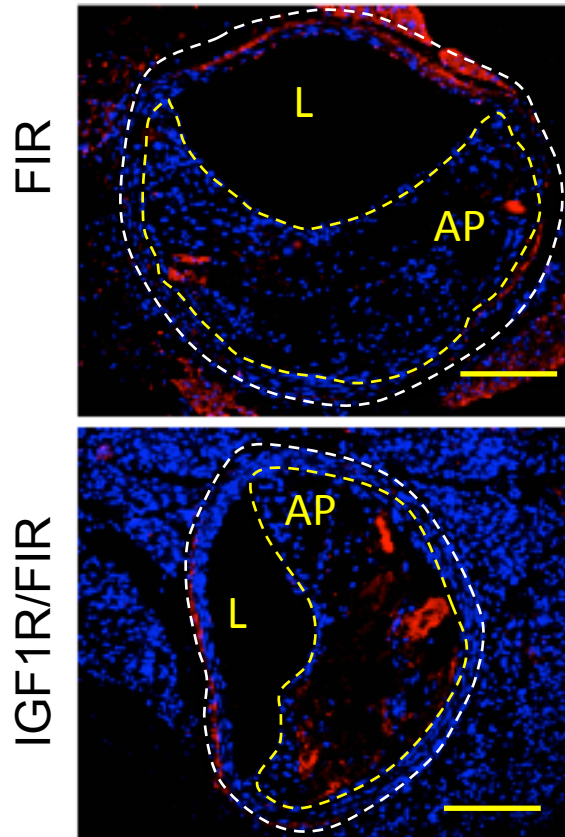**B**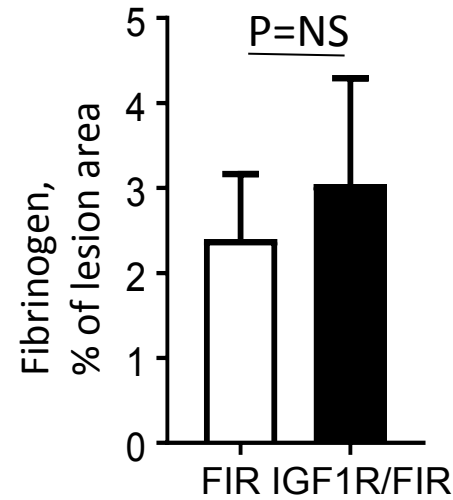

**Supplemental Figure XI. Fibrin deposition in the atherosclerotic plaque.** Brachiocephalic arteries (BCA) were dissected from IGF-1R-deficient (n=10) and control FIR mice (n=8) and cross-sections were immunostained for fibrinogen (A, representative images). Fibrinogen-positive plaque area was normalized per lesion area. B, Quantitative data. Yellow dashed line, atherosclerotic plaque (AP), white dashed line, external elastic lamina, L, lumen. Scale bar, 50um.

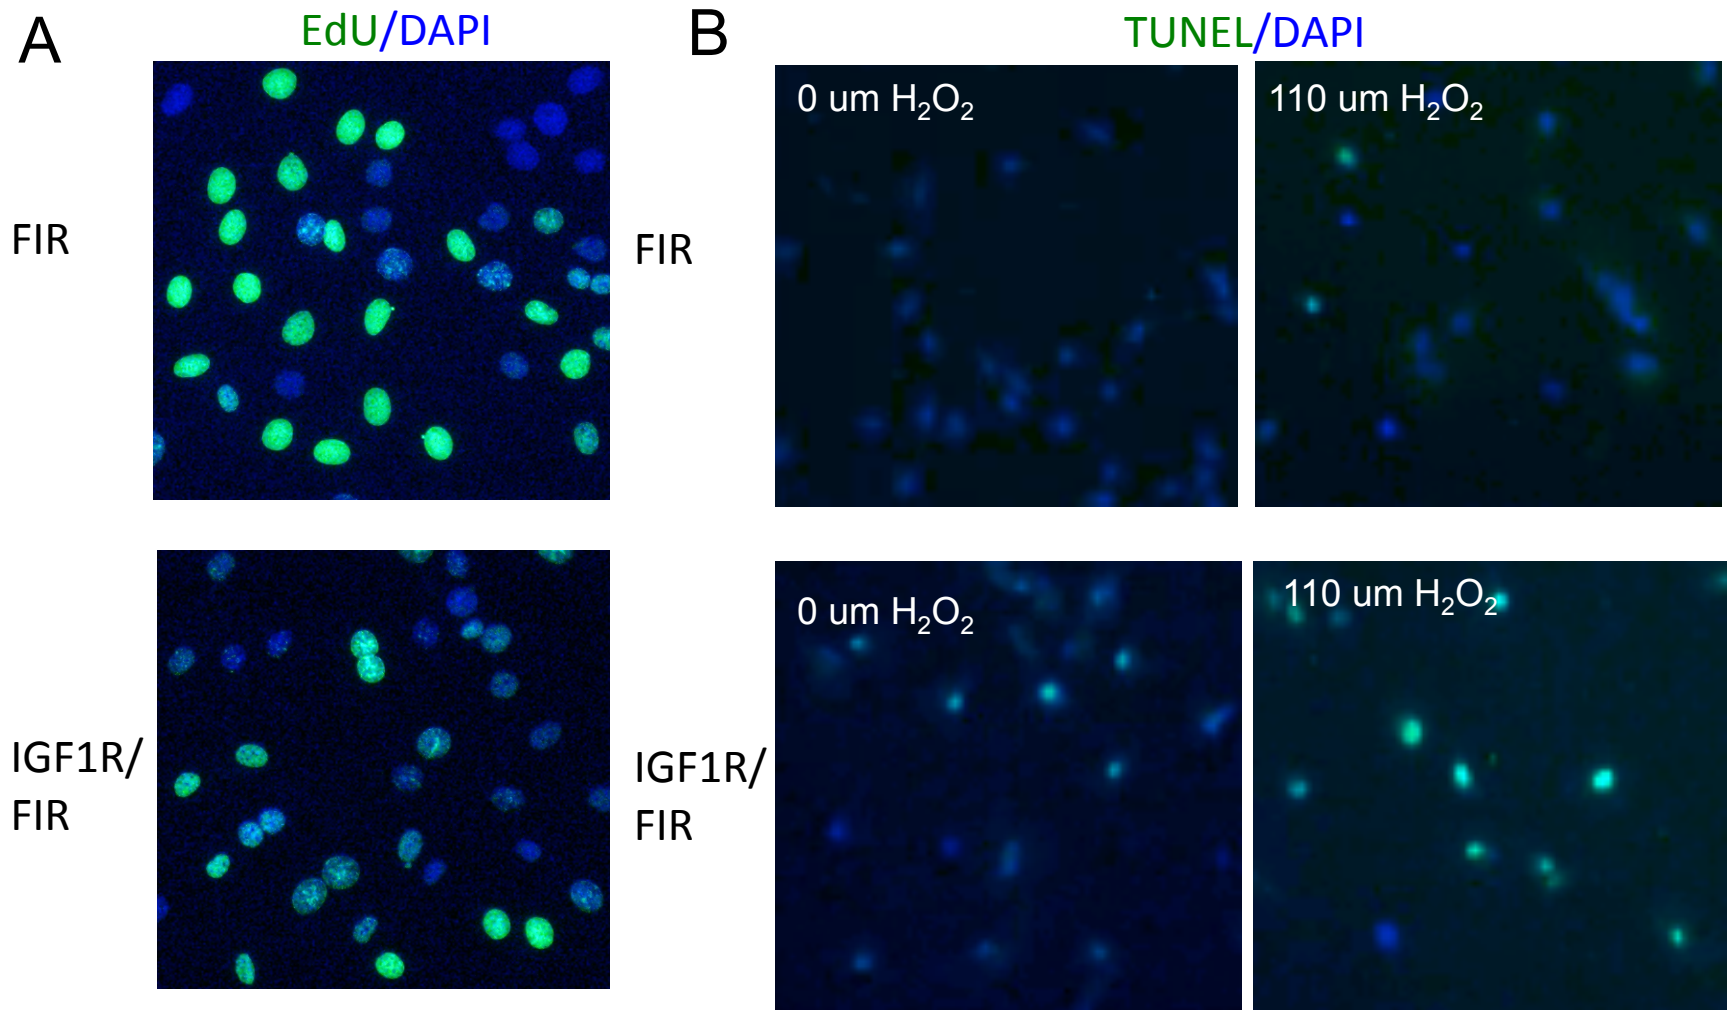

**Supplemental Figure XII. Aortic SMC isolated from IGF-1R-deficient mice had reduced proliferation and increased apoptotic rates.** A, Cell proliferation rate was quantified by labeling of replicating DNA with EdU following by fluorescent-positive cell count (n=6/group). B, To quantify apoptosis, IGF1R/FIR- and FIR-derived aortic SMC were exposed to  $\text{H}_2\text{O}_2$  for 16h in serum-free media followed by staining with TUNEL assay (n=4/group). Representative images are shown.

**Supplemental Table 1. Aorta, aortic valve and brachiocephalic artery (BCA) morphometry**

|                                                   | <b>FIR</b> | <b>IGF1R/FIR</b> | <b>P value</b> |
|---------------------------------------------------|------------|------------------|----------------|
| Aorta length*, mm                                 | 40.3±2.2   | 33.94±2.9        | 0.017          |
| Aortic valve circumference**, x10 <sup>3</sup> um | 5.57±0.28  | 4.44±0.27        | 0.009          |
| Aortic valve lumen, mm <sup>2</sup>               | 1.74±0.16  | 1.17±0.13        | 0.012          |
| Aortic valve media area, mm <sup>2</sup>          | 0.37±0.01  | 0.21±0.02        | <0.0001        |
| Thoracic aorta circumference, x10 <sup>3</sup> um | 3.40±0.11  | 2.69±0.12        | 0.004          |
| Thoracic aorta lumen, mm <sup>2</sup>             | 0.61±0.05  | 0.44±0.05        | 0.099          |
| Thoracic aorta media area, mm <sup>2</sup>        | 0.21±0.02  | 0.12±0.01        | 0.002          |
| BCA circumference, x10 <sup>3</sup> um            | 2.26±0.12  | 1.88±0.13        | 0.092          |
| BCA lumen, mm <sup>2</sup>                        | 0.26±0.03  | 0.17±0.04        | 0.049          |
| BCA media area, mm <sup>2</sup>                   | 0.07±0.01  | 0.04±0.01        | 0.003          |

\*Aorta length was quantified from the top of the left ventricle until the iliac bifurcation

\*\*Aortic valve, thoracic aorta and brachiocephalic artery circumference were quantified at the external elastic lamina with H&E-stained cross-sections

Data were obtained for n=5/group

**Supplemental Table 2. Serum cytokines levels in IGF1R/FIR and FIR mice**

| <b>Cytokine</b>               | <b>IGF1R/FIR, pg/ml</b> | <b>FIR, pg/ml</b> | <b>Fold change</b> |
|-------------------------------|-------------------------|-------------------|--------------------|
| IL-1 $\alpha$                 | 0.34 $\pm$ 0.01         | 0.32 $\pm$ 0.06   | 1.06               |
| <b>IL-1<math>\beta</math></b> | 0.44 $\pm$ 0.02         | 0.30 $\pm$ 0.03   | 1.47**             |
| IL-2                          | 0.29 $\pm$ 0.03         | 0.22 $\pm$ 0.01   | 1.32               |
| <b>IL-4</b>                   | 0.337 $\pm$ 0.019       | 0.21 $\pm$ 0.01   | 1.605**            |
| <b>IL-6</b>                   | 0.476 $\pm$ 0.017       | 0.305 $\pm$ 0.028 | 1.56**             |
| <b>IL-10</b>                  | 0.39 $\pm$ 0.04         | 0.25 $\pm$ 0.02   | 1.56*              |
| <b>IL-12</b>                  | 0.35 $\pm$ 0.03         | 0.23 $\pm$ 0.02   | 1.48*              |
| IL-17 $\alpha$                | 0.358 $\pm$ 0.01        | 0.277 $\pm$ 0.029 | 1.29               |
| IFN- $\gamma$                 | 0.289 $\pm$ 0.039       | 0.245 $\pm$ 0.015 | 1.17               |
| TNF- $\alpha$                 | 0.27 $\pm$ 0.03         | 0.19 $\pm$ 0.002  | 1.40               |
| G-CSF                         | 0.46 $\pm$ 0.12         | 0.43 $\pm$ 0.09   | 1.08               |
| GM-CSF                        | 0.47 $\pm$ 0.10         | 0.56 $\pm$ 0.082  | 0.84               |

\*P<0.05, \*\*P<0.005. N=6/group

**Supplemental Table 3. Top genes overexpressed and underexpressed in aortic SMC isolated from SM22 $\alpha$ -CreKI/IGF1R-flox mice compared to FIR mice\***

| Gene symbol  | RefSeq number    | Description                                        | Fold change | P-value          |
|--------------|------------------|----------------------------------------------------|-------------|------------------|
| <b>Ackr4</b> | <b>NM_145700</b> | <b>Chemokine (C-C motif) receptor-like 1</b>       | <b>7.44</b> | <b>&lt;0.001</b> |
| <b>Cxcr3</b> | <b>NM_009910</b> | <b>Chemokine (C-X-C motif) receptor 3</b>          | <b>2.33</b> | <b>0.04</b>      |
| Cxcl12       | NM_021704        | Chemokine (C-X-C motif) ligand 12                  | 2.59        | 0.11             |
| Xcl1         | NM_008510        | Chemokine (C motif) ligand 1                       | 2.26        | 0.06             |
| Cmtm3        | NM_024217        | CKLF-like MARVEL transmembrane domain containing 3 | -2.56       | 0.12             |
| IL6          | NM_001314054     | Interleukin 6                                      | -2.31       | 0.08             |
| Ccl5         | NM_013653        | Chemokine (C-C motif) ligand 5                     | -3.05       | 0.13             |
| Cmklr1       | NM_008153        | Chemokine-like receptor 1                          | -3.00       | 0.12             |

\*Gene expression was quantified using real-time RT<sup>2</sup> Profiler™ Mouse Chemokines & Receptors PCR Array (Qiagen) in accordance with manufacturer's instructions. N=5 for SMC isolated from SM22 $\alpha$ -CreKI/IGF1R-flox mice and n=7 for SMC isolated from FIR mice. The P values were calculated based on a Student's t-test of the replicate 2<sup>-Delta CT</sup> values for each gene in the SM22 $\alpha$ -CreKI/IGF1R-flox and FIR groups.

**Supplemental Table 4. Relative gene expression of Ackr4, Cxcr3, Cxcl12 and Xcl1 in aortic SMC isolated from SM22 $\alpha$ -CreKI/IGF1R-flox mice compared to FIR mice\*\***

| Gene symbol   | Fold change  | P-value          |
|---------------|--------------|------------------|
| <b>Ackr4</b>  | <b>10.77</b> | <b>&lt;0.001</b> |
| Cxcr3         | 2.22         | 0.38             |
| <b>Cxcl12</b> | <b>5.98</b>  | <b>0.04</b>      |
| <b>Xcl1</b>   | <b>9.98</b>  | <b>0.06</b>      |

\*\*Relative gene expression was quantified with 40-cycle 2-step real-time PCR using sequence-specific primer pairs (Qiagen, RT<sup>2</sup> qPCR Primer Assay) in the iCycler IQ Real-Time Detection System (Bio-Rad). N=5 for SMC isolated from SM22 $\alpha$ -CreKI/IGF1R-flox mice and n=7 for SMC isolated from FIR mice.

## Major Resources Tables

### Animals

| Species/Strain                                                                | Vendor or Source       | Background Strain | Sex  |
|-------------------------------------------------------------------------------|------------------------|-------------------|------|
| Apoe <sup>-/-</sup> mice                                                      | Jackson Lab            | C57/BI6           | M, F |
| SM22α-CreKI <sup>+/+</sup> mice                                               | Dr. Eugene Chen        | C57/BI6           | M, F |
| LoxP-flanked IGF-1R mice                                                      | Dr. Jens Brüning       | C57/BI6           | M, F |
| SM22α-Cre <sup>+/+</sup> /Apoe <sup>-/-</sup> mice                            | Investigator generated | C57/BI6           | M, F |
| LoxP <sup>+/+</sup> -IGF-1R/Apoe <sup>-/-</sup> mice                          | Investigator generated | C57/BI6           | M, F |
| LoxP <sup>+/+</sup> -IGF1R/SM22α-Cre <sup>+/+</sup> /Apoe <sup>-/-</sup> mice | Investigator generated | C57/BI6           | M, F |

### Antibodies

| Target antigen                           | Vendor or Source | Catalog # | Working concentration, ug/ml | Lot # (preferred but not required) |
|------------------------------------------|------------------|-----------|------------------------------|------------------------------------|
| IGF-1R beta (C-20)                       | Santa Cruz       | sc-713    | 1.0 (WB)                     |                                    |
| Phospho-Akt (Ser473) (D9E)               | Cell Signaling   | 4060      | 5.0 (WB)                     |                                    |
| Akt                                      | Cell Signaling   | 9272      | 5.0 (WB)                     |                                    |
| Phospho-p38 MAPK (Thr180/Tyr182)         | Cell Signaling   | 4631      | 0.2 (WB)                     |                                    |
| p38 MAPK                                 | Cell Signaling   | 9212      | 0.2 (WB)                     |                                    |
| Beta-actin                               | Sigma            | A2228     | 0.05 (WB)                    |                                    |
| Calponin (EP798Y)                        | Abcam            | Ab46794   | 10.0 (IF)<br>5.0 (IHC)       |                                    |
| Alpha-actin, smooth muscle (clone ASM-1) | Millipore        | CBL171    | 2.0 (IF)<br>1.0 (IHC)        |                                    |
| Alexa Fluor® 488 Goat anti-rabbit        | Molecular Probes | A-11008   | 5.0 (ICC)                    |                                    |
| Alexa Fluor® 594 Goat anti-rabbit        | Molecular Probes | A-11037   | 1.0 (ICC)                    |                                    |
| Mac-3 (2-4G2)                            | BD Biosciences   | 553142    | 10.0 (IHC)                   |                                    |
| ER-TR7                                   | Santa Cruz       | sc-73356  | 2.0 (IHC)                    |                                    |



|                                           |                 |                    |           |  |
|-------------------------------------------|-----------------|--------------------|-----------|--|
| LARP-6 (B01P)                             | Abnova          | H00055323<br>-B01P | 0.25 (WB) |  |
| N-tyrosine                                | Millipore Sigma | AB5411             | 2.0 (IHC) |  |
| Cre recombinase<br>(D7L7L)                | Cell Signaling  | 15036S             | 0.2 (WB)  |  |
| Alpha-Tubulin<br>(11H10)                  | Cell Signaling  | 9099               | 0.1 (WB)  |  |
| SM22- $\alpha$                            | Abcam           | ab14106            | 2.0 (IHC) |  |
| Smooth muscle<br>Myosin heavy<br>chain 11 | Abcam           | ab53219)           | 2.0 (IHC) |  |
| Fibrinogen                                | Abcam           | ab34269            | 2.0 (IHC) |  |
| SDF-1                                     | Abcam           | ab9797             | 2.5 (IHC) |  |

WB – Western blotting, IF – immunofluorescence, IHC - immunohistochemistry

### Cultured Cells

| Name                                                                                                              | Vendor or Source       | Sex (F, M, or unknown) |
|-------------------------------------------------------------------------------------------------------------------|------------------------|------------------------|
| Aortic SMC from LoxP <sup>+/+</sup> -IGF-1R/Apoe <sup>-/-</sup> mice                                              | Investigator generated | M                      |
| Aortic SMC from LoxP <sup>+/+</sup> -IGF1R/SM22 $\alpha$ -Cre <sup>+/-</sup> /Apoe <sup>-/-</sup> mice            | Investigator generated | M                      |
| Embryonic fibroblasts from LoxP <sup>+/+</sup> -IGF-1R/Apoe <sup>-/-</sup> mice                                   | Investigator generated | M                      |
| Embryonic fibroblasts from LoxP <sup>+/+</sup> -IGF1R/SM22 $\alpha$ -Cre <sup>+/-</sup> /Apoe <sup>-/-</sup> mice | Investigator generated | M                      |
| Skin fibroblasts from LoxP <sup>+/+</sup> -IGF-1R/Apoe <sup>-/-</sup> mice                                        | Investigator generated | M                      |
| Skin fibroblasts from LoxP <sup>+/+</sup> -IGF1R/SM22 $\alpha$ -Cre <sup>+/-</sup> /Apoe <sup>-/-</sup> mice      | Investigator generated | M                      |
| Lung fibroblasts from LoxP <sup>+/+</sup> -IGF-1R/Apoe <sup>-/-</sup> mice                                        | Investigator generated | M                      |
| Lung fibroblasts from LoxP <sup>+/+</sup> -IGF1R/SM22 $\alpha$ -Cre <sup>+/-</sup> /Apoe <sup>-/-</sup> mice      | Investigator generated | M                      |
